# Supplementary material for: Identification of Cell Cycle Dependent Interaction Partners of the Septins by Quantitative Mass Spectrometry
Source: PubMed Central journal article supplement (PMC4752459; doi:10.1371/journal.pone.0148340), 2016-02-12
Supplement: pone.0148340.s010.pdf [file pone.0148340.s010.pdf]

**Table S 2 Steady-state SPLIFF analysis data****nF<sub>D</sub>** normalized extent of interaction; **SEM** standard error of the mean

| <b>N<sub>ub</sub>-Fusion</b> | <b>0 Cu<sup>2+</sup></b> |                                 | <b>100 μM Cu<sup>2+</sup></b> |                                 |
|------------------------------|--------------------------|---------------------------------|-------------------------------|---------------------------------|
|                              |                          |                                 |                               |                                 |
|                              | <b>Measured cells</b>    | <b>nF<sub>D</sub> ± SEM [%]</b> | <b>Measured cells</b>         | <b>nF<sub>D</sub> ± SEM [%]</b> |
| Bni4                         | 47                       | -3.39 ± 2.37                    | 46                            | 7.31 ± 2.00                     |
| Bni5                         | 28                       | 87.77 ± 0.77                    | 20                            | 93.52 ± 0.67                    |
| Bud3                         |                          |                                 |                               |                                 |
| collar                       | 30                       | 59.20 ± 2.27                    | 40                            | 75.77 ± 1.28                    |
| split rings                  | 30                       | 68.38 ± 2.01                    | 40                            | 84.78 ± 0.77                    |
| Bud4                         |                          |                                 |                               |                                 |
| collar                       | 39                       | 61.54 ± 1.95                    | 40                            | 90.63 ± 0.98                    |
| split rings                  | 25                       | 69.08 ± 2.60                    | 31                            | 93.11 ± 0.44                    |
| Cdc11                        | 40                       | 95.18 ± 0.61                    | 40                            | 93.99 ± 0.29                    |
| Coy1                         | 18                       | 8.32 ± 3.09                     | 20                            | 11.56 ± 4.10                    |
| Cse1                         | 21                       | 25.35 ± 4.07                    | 25                            | 83.20 ± 0.80                    |
| Gin4                         | 41                       | 86.76 ± 0.87                    | 44                            | 96.18 ± 0.15                    |
| Glc7                         | 27                       | -10.41 ± 7.99                   | 27                            | 6.33 ± 8.44                     |
| Hsl1                         | 42                       | 55.21 ± 1.70                    | 46                            | 87.65 ± 0.84                    |
| Mrc1                         | 28                       | 33.94 ± 2.89                    | 24                            | 49.74 ± 2.82                    |
| Nap1                         | 30                       | 2.47 ± 3.47                     | 22                            | -40.11 ± 5.15                   |
| New1                         | 18                       | 46.59 ± 4.72                    | 30                            | 89.39 ± 0.54                    |
| Nop4                         | 21                       | 8.29 ± 3.36                     | 23                            | 61.84 ± 1.90                    |
| Nui-empty(P)                 | 43                       | 0.00 ± 1.92                     | 43                            | 0.00 ± 3.13                     |
| Ppz2                         | 35                       | -15.86 ± 2.44                   | 36                            | 7.69 ± 3.37                     |
| Prk1                         | 25                       | -18.73 ± 4.16                   | 14                            | 10.70 ± 4.88                    |
| Rlp7                         | 25                       | 25.41 ± 3.14                    | 22                            | 45.82 ± 3.12                    |
| Sfb3                         | 30                       | 20.63 ± 2.88                    | 20                            | 66.59 ± 3.36                    |
| Sic1                         | 30                       | 2.80 ± 3.28                     | 27                            | 10.43 ± 4.98                    |
| Sla2                         | 28                       | 17.88 ± 3.57                    | 19                            | 93.49 ± 0.63                    |
| Ste20                        | 26                       | 31.58 ± 1.91                    | 20                            | 62.53 ± 3.12                    |
| Syp1                         | 26                       | 34.48 ± 2.34                    | 19                            | 53.13 ± 3.54                    |
| Vps1                         | 44                       | 6.48 ± 2.65                     | 21                            | 50.72 ± 2.55                    |
