# Supplementary material for: Identification of Cell Cycle Dependent Interaction Partners of the Septins by Quantitative Mass Spectrometry
Source: PubMed Central journal article supplement (PMC4752459; doi:10.1371/journal.pone.0148340), 2016-02-12
Supplement: pone.0148340.s011.pdf [file pone.0148340.s011.pdf]

**Table S3: Yeast strains used in this work.**

Unlisted N<sub>ub</sub>-fusion strains were available in the Johnsson Lab (Hruby et al, 2011).

| Name                           | Relevant genotype                                                           | Source                  | Origin                                 |
|--------------------------------|-----------------------------------------------------------------------------|-------------------------|----------------------------------------|
| BY Ammerer                     | <i>MATa arg4::KanMX4 his3Δ1 leu2Δ0 lys1::KanMX4 lys2Δ0 ura3Δ0</i>           |                         | Ammerer Lab, MFPL<br>Vienna University |
| BY SILAC                       | <i>TRP1::HIS3</i>                                                           | BY Ammerer              | This work                              |
| Bud3-TAP                       | <i>BUD3::BUD3-TAP URA3</i>                                                  | BY SILAC                | This work                              |
| Bud4-TAP                       | <i>BUD4::BUD4-TAP URA3</i>                                                  | BY SILAC                | This work                              |
| Cdc11-GFP                      | <i>CDC11::CDC11-GFP TRP1</i>                                                | BY SILAC                | This work                              |
| Cdc11-TAP                      | <i>CDC11::CDC11-TAP K. lactis-TRP1</i>                                      | BY SILAC                | This work                              |
| BY SILAC<br><i>cdc15ts</i>     | <i>CDC15::cdc15-1 C. maltosis-LEU2</i>                                      | BY SILAC                | This work                              |
| Cdc11-GFP                      | <i>CDC11::CDC11-GFP TRP1</i>                                                | BY SILAC <i>cdc15ts</i> | This work                              |
| Cdc11-TAP                      | <i>CDC11::CDC11-TAP K. lactis-TRP1</i>                                      | BY SILAC <i>cdc15ts</i> | This work                              |
| Shs1-mCherry<br>Tub1-GFP       | <i>SHS1::SHS1-mCherry URA3<br/>TUB1::TUB1-GFP TRP1</i>                      | BY SILAC <i>cdc15ts</i> | This work                              |
| New1-TAP                       | <i>NEW1::NEW1-TAP URA3</i>                                                  | BY SILAC                | This work                              |
| Pno1-TAP                       | <i>PNO1::PNO1-TAP URA3</i>                                                  | BY SILAC                | This work                              |
| Rlp7-TAP                       | <i>RLP7::RLP7-TAP URA3</i>                                                  | BY SILAC                | This work                              |
| Sfb3-TAP                       | <i>SFB3::SFB3-TAP URA3</i>                                                  | BY SILAC                | This work                              |
| Shs1-mCherry<br>Bni4-GFP       | <i>SHS1::SHS1-mCherry URA3<br/>BNI4::BNI4-GFP TRP1</i>                      | BY SILAC                | This work                              |
| Shs1-mCherry<br>Nip1-GFP       | <i>SHS1::SHS1-mCherry URA3<br/>NIP1::NIP1-GFP TRP1</i>                      | BY SILAC                | This work                              |
| Shs1-mCherry<br>Pno1-GFP       | <i>SHS1::SHS1-mCherry URA3<br/>PNO1::PNO1-GFP TRP1</i>                      | BY SILAC                | This work                              |
| Sla2-TAP                       | <i>SLA2::SLA2-TAP URA3</i>                                                  | BY SILAC                | This work                              |
| Ste20-TAP                      | <i>STE20::STE20-TAP URA3</i>                                                | BY SILAC                | This work                              |
| Syp1-TAP                       | <i>SYPI::SYPI-TAP URA3</i>                                                  | BY SILAC                | This work                              |
| Vps1-GFP                       | <i>VPS1::VPS1-GFP TRP1</i>                                                  | BY SILAC                | This work                              |
| ESM1278                        | <i>MATa ade2-101 leu2Δ1 lys2-801<br/>trp1-Δ63 his3-Δ200 ura3-52 cdc15-1</i> |                         | (Perreira et al., 2002)                |
| ESM1278<br><i>cdc15-1 LEU2</i> | <i>cdc15-1 C. maltosis-LEU2</i>                                             | ESM1278                 | This work                              |
| JD47                           | <i>MATa his3-Δ200 leu2-3,112 lys2-801<br/>trp1Δ63 ura3-52</i>               |                         | (Madura et al., 1993)                  |
| Cdc3-CCG                       | <i>CDC3::CDC3-CCG URA3</i>                                                  | JD47                    | This work                              |

|                          |                                                                     |      |                               |
|--------------------------|---------------------------------------------------------------------|------|-------------------------------|
| Cdc10-CCG                | <i>CDC10::CDC10-CCG URA3</i>                                        | JD47 | This work                     |
| Cdc11-CCG                | <i>CDC11::CDC11-CCG URA3</i>                                        | JD47 | This work                     |
| Cdc12-CCG                | <i>CDC12::CDC12-CCG URA3</i>                                        | JD47 | This work                     |
| Shs1-CCG                 | <i>SHS1::SHS1-CCG URA3</i>                                          | JD47 | This work                     |
| Shs1-mCherry<br>Bud3-GFP | <i>SHS1::SHS1-mCherry URA3</i><br><i>BUD3::BUD3-GFP TRP1</i>        | JD47 | This work                     |
| Shs1-mCherry<br>Bud4-GFP | <i>SHS1::SHS1-mCherry URA3</i><br><i>BUD4::BUD4-GFP TRP1</i>        | JD47 | This work                     |
| JD53                     | <i>MATa his3-Δ200 leu2-3,112 lys2-801</i><br><i>trp1Δ63 ura3-52</i> |      | (Dohmen <i>et al.</i> , 1995) |
| N <sub>ub</sub> -Coy1    | <i>P<sub>COY1</sub>::kanMX6 P<sub>CUP1</sub>N<sub>ub</sub>-HA</i>   | JD53 | This work                     |
| N <sub>ub</sub> -Cse1    | <i>P<sub>CSE1</sub>::kanMX6 P<sub>CUP1</sub>N<sub>ub</sub>-HA</i>   | JD53 | This work                     |
| N <sub>ub</sub> -Glc7    | <i>P<sub>GLC7</sub>::kanMX6 P<sub>CUP1</sub>N<sub>ub</sub>-HA</i>   | JD53 | This work                     |
| N <sub>ub</sub> -Mrc1    | <i>P<sub>MRC1</sub>::kanMX6 P<sub>CUP1</sub>N<sub>ub</sub>-HA</i>   | JD53 | This work                     |
| N <sub>ub</sub> -New1    | <i>P<sub>NEW1</sub>::kanMX6 P<sub>CUP1</sub>N<sub>ub</sub>-HA</i>   | JD53 | This work                     |
| N <sub>ub</sub> -Nop4    | <i>P<sub>NOP4</sub>::kanMX6 P<sub>CUP1</sub>N<sub>ub</sub>-HA</i>   | JD53 | This work                     |
| N <sub>ub</sub> -Rlp7    | <i>P<sub>RLP7</sub>::kanMX6 P<sub>CUP1</sub>N<sub>ub</sub>-HA</i>   | JD53 | This work                     |
| N <sub>ub</sub> -Sfb3    | <i>P<sub>SFB3</sub>::kanMX6 P<sub>CUP1</sub>N<sub>ub</sub>-HA</i>   | JD53 | This work                     |
| N <sub>ub</sub> -Sic1    | <i>P<sub>SIC1</sub>::kanMX6 P<sub>CUP1</sub>N<sub>ub</sub>-HA</i>   | JD53 | This work                     |
| N <sub>ub</sub> -Vps1    | <i>P<sub>VPS1</sub>::kanMX6 P<sub>CUP1</sub>N<sub>ub</sub>-HA</i>   | JD53 | This work                     |
